# Supplementary material for: Tankyrase-mediated ADP-ribosylation is a regulator of TNF-induced death
Source: PubMed Central journal article supplement — Sci Adv. 2022 May 11;8(19):eabh2332. doi: 10.1126/sciadv.abh2332 (PMC9094663; doi:10.1126/sciadv.abh2332), 2022-05-11
Supplement: sciadv.abh2332_sm.pdf [file sciadv.abh2332_sm.pdf]

Supplementary Materials for  
**Tankyrase-mediated ADP-ribosylation is a regulator of TNF-induced death**

Lin Liu, Jarrod J. Sandow, Deena M. Leslie Pedrioli, Andre L. Samson, Natasha Silke, Tobias Kratina, Rebecca L. Ambrose, Marcel Doerflinger, Zhaoqing Hu, Emma Morrish, Diep Chau, Andrew J. Kueh, Cheree Fitzibbon, Marc Pellegrini, Jaclyn S. Pearson, Michael O. Hottiger, Andrew I. Webb, Najoua Lalaoui\*, John Silke\*

\*Corresponding author. Email: lalaoui@wehi.edu.au (N.L.); silke@wehi.edu.au (J.S.)

Published 11 May 2022, *Sci. Adv.* **8**, eabh2332 (2022)  
DOI: 10.1126/sciadv.abh2332

**The PDF file includes:**

Figs. S1 to S7  
Table S1  
Legend for table S2

**Other Supplementary Material for this manuscript includes the following:**

Table S2

# Supplementary data

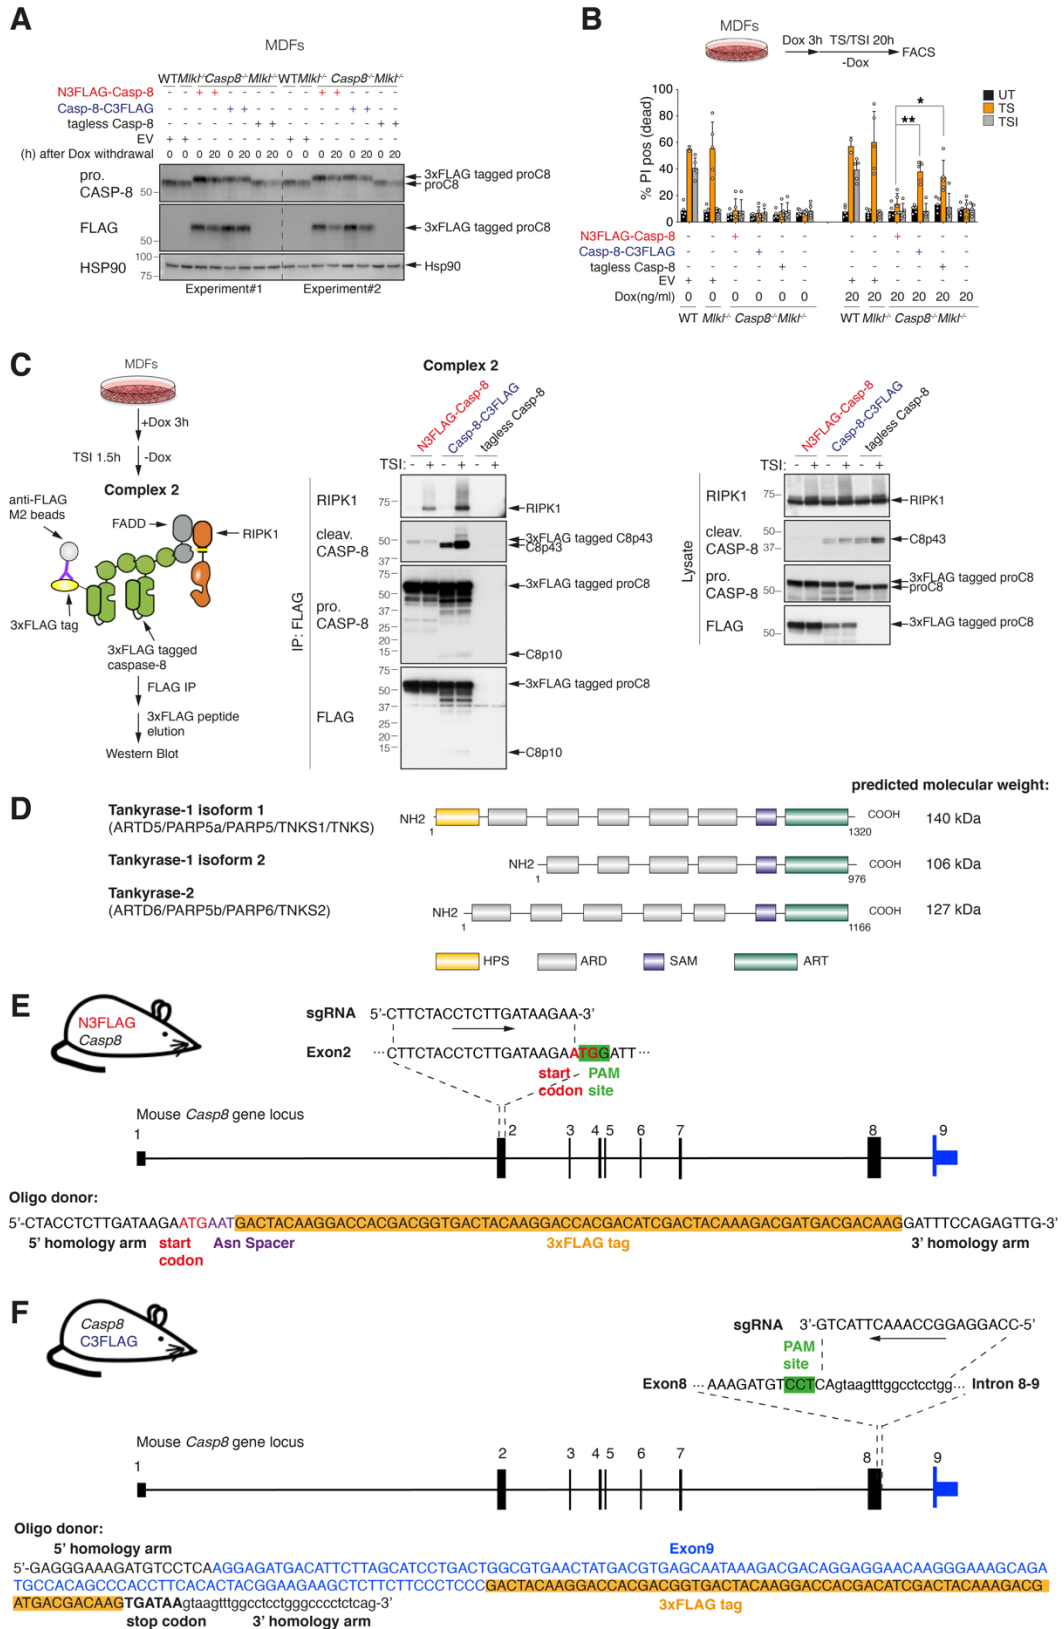

**G** MDFs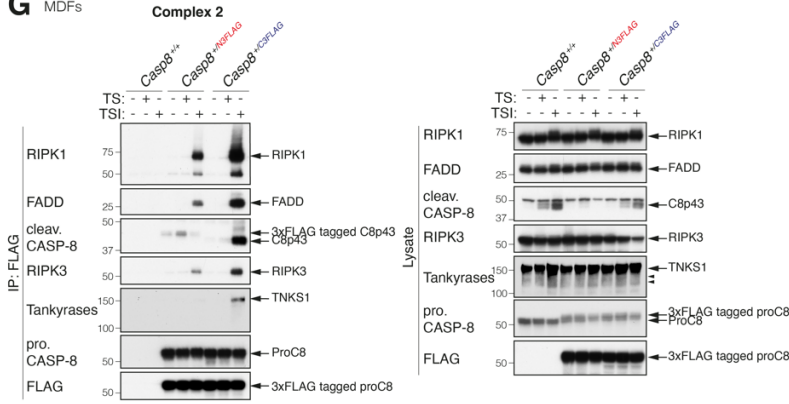**I** Casp8<sup>+/C3FLAG</sup> BMDMs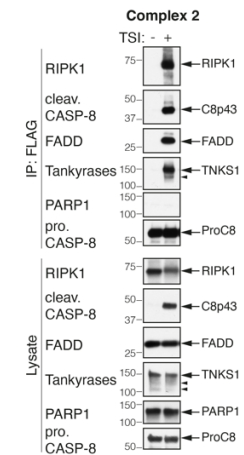**H** Casp8<sup>+/C3FLAG</sup> MEFs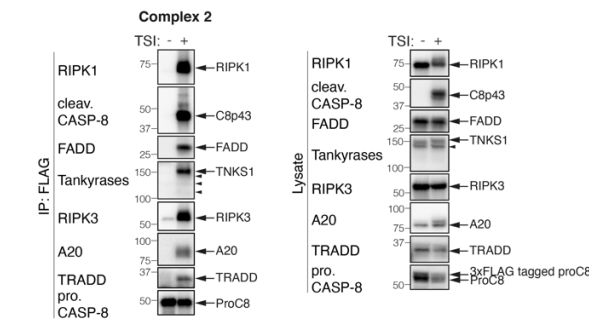**J** MEFs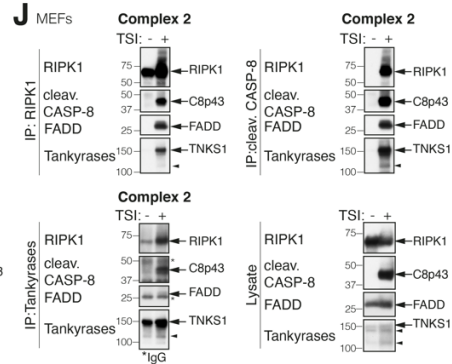**K** MDFs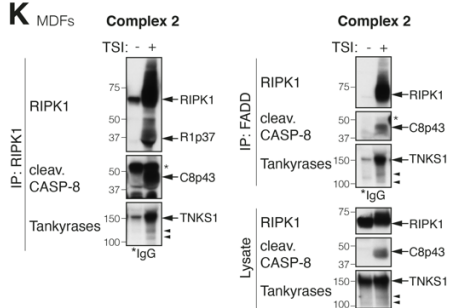**L** HT1080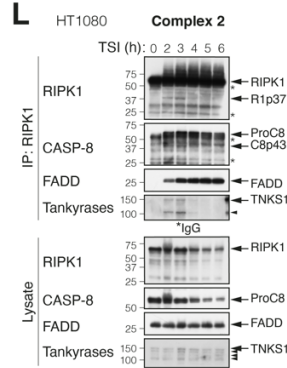**M** HT29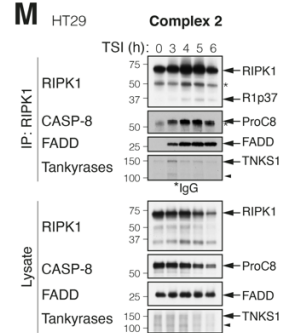**N** Casp8<sup>+/C3FLAG</sup> MEFs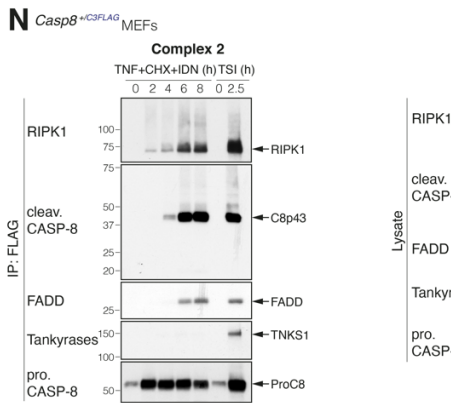**O** MEFs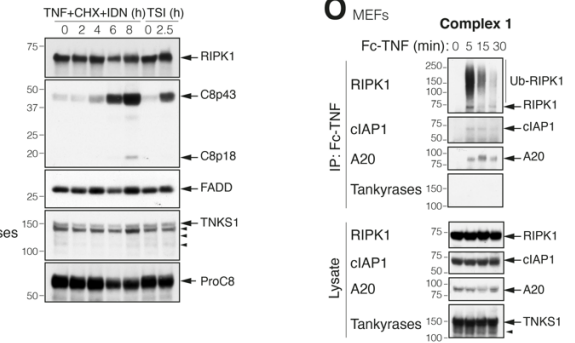

## Fig. S1. Tankyrase-1 is a novel interactor of native TNFR1 complex 2

**A**, Western blot analysis of cell lysates from *Casp8*<sup>-/-</sup>.*Mlkl*<sup>-/-</sup> MDFs expressing doxycycline (Dox)-inducible N- (red) or C- (blue) 3x FLAG tagged murine caspase-8 or tagless caspase-8. Wild-type (WT) or *Mlkl*<sup>-/-</sup> MDFs expressing an empty vector (EV) were used as controls. Cells were treated with 20 ng/mL Dox for 3 hours and then Dox was withdrawn. Samples were harvested 0 hour or 20 hours after Dox withdrawal for Western blot analysis.

**B**, Level of cell death assessed by propidium iodide (PI) positive cells. Cells were pre-treated with 20 ng/mL Dox for 3 hours followed by stimulation with TNF (100 ng/mL) + Smac-mimetic compound A (500 nM) (TS) ± caspase inhibitor IDN-6556 (5 μM) for 20 hours in the absence of Dox. Graph shows mean ± SEM, n=3 independent experiments. Comparisons were performed with a Student's t test whose values are denoted in the figures as \*p ≤ 0.05 and \*\*p ≤ 0.01.

**C**, Left, schematic depicting the anti-FLAG immunoprecipitation. Right, TNF-induced complex 2 immunoprecipitation using anti-FLAG M2 affinity beads. Western blot analysis of complex 2 from *Casp8*<sup>-/-</sup>.*Mlkl*<sup>-/-</sup> MDFs expressing Dox-inducible N- or C- 3x FLAG tagged murine caspase-8 or tagless caspase-8 using the indicated antibodies. Cells were treated with 20 ng/mL Dox for 3 hours followed by stimulation with TNF (100 ng/mL) + Smac-mimetic (500 nM) + caspase inhibitor (5 μM) (TSI) for 1.5 hours in the absence of Dox before being subjected to anti-FLAG immunoprecipitation. Caspase inhibitor was used to stabilize complex 2.

**D**, Schematic comparison of the domain architecture of the murine TNKS1, TNKS1 isoform2 and TNKS2. Domains are: HPS: histidine, proline and serine-rich region; ARD: ankyrin repeat domains; SAM: sterile α-motif; ART: ADP-ribosyltransferase catalytic domain. ARDs provide binding sites for interaction between tankyrases and other proteins. The SAM domain mediates protein-protein interactions, form homo- and hetero-oligomers and also binds to DNA, RNA and lipids. SAM domain is also critical for optimal catalytic activity. The ART domain is responsible for the ADP-ribosyltransferase activity.

**E-F**, Schematic representation of the generation of *Casp8*<sup>N3FLAG</sup> (**E**) or *Casp8*<sup>C3FLAG</sup> (**F**) mice using CRISPR/Cas9 technology. For N-3x FLAG tagged caspase-8 knock-in mice, an Asn Spacer was introduced into the oligo donor to ensure successful gene translation. For C-3x FLAG tagged caspase-8 knock-in mice, the PAM site was in exon 8 and an oligo donor composed of protein coding region of exon 9 with a 3x FLAG tag followed by two stop codons were designed because there was no usable PAM site at the last exon (exon 9) of *Casp8* gene and a *Casp8* pseudogene known as Gm20257 showed ~133 bp of sequence identity to *Casp8* exon 9 and was nearby on the same chromosome (chromosome 1).

**G-I**, TNF-induced complex 2 immunoprecipitation using anti-FLAG M2 affinity beads. Western blot analysis of complex 2 and lysates from *Casp8*<sup>+/+</sup>, *Casp8*<sup>+N3FLAG</sup> and *Casp8*<sup>+C3FLAG</sup> MDFs (**G**) *Casp8*<sup>+C3FLAG</sup> MEFs (**H**) or *Casp8*<sup>+C3FLAG</sup> BMDMs (**I**) using the indicated antibodies is shown. Cells were treated with TNF (100 ng/mL) + Smac-mimetic (500 nM) with or without caspase inhibitor (5 μM) for 1.5 hours before being subjected to anti-FLAG immunoprecipitation. Caspase inhibitor was used to stabilize complex 2.

**J-K**, TNF-induced complex 2 immunoprecipitation. WT MEFs (**J**) or MDFs (**K**) were treated with TSI (as in **G-I**) to induce complex 2 assembly. The lysates were immunoprecipitated with anti-RIPK1 or anti-cleaved caspase-8 or anti-FADD or anti-tankyrase. Western blot analysis using the indicated antibodies is shown.

**L-M**, TNF-induced complex 2 immunoprecipitation using anti-RIPK1. Western blot analysis of complex 2 and lysates from HT1080 (**L**) and HT29 (**M**) cells using the indicated antibodies is shown. Cells were treated with TSI (as in **G-I**) for indicated time points.

**N**, TNF-induced complex 2 immunoprecipitation using anti-FLAG M2 affinity beads. Western blot analysis of complex 2 and lysates from *Casp8<sup>+C3FLAG</sup>* MEFs using the indicated antibodies is shown. Cells were treated with TNF (100 ng/mL) + Smac-mimetic (500 nM) + caspase inhibitor (5  $\mu$ M) (TSI) for 2.5 hours or TNF (100 ng/mL) + cycloheximide (CHX) (1  $\mu$ g/mL) + caspase inhibitor (5  $\mu$ M) (TNF+CHX+IDN) for the indicated time points, followed by immunoprecipitation with anti-FLAG M2 affinity beads.

**O**, TNF-induced complex 1 immunoprecipitation. WT MEFs were treated with Fc-TNF (1  $\mu$ g/mL) for the indicated time points, followed by immunoprecipitation with protein A Sepharose and Western blot analysis.

Filled arrowheads alone denote bands between 100 kDa and 150 kDa detected by anti-tankyrase which might indicate TNKS1 isoform 2 (106 kDa) or TNKS2 (127 kDa). Double bands around 150kDa in anti-tankyrase blots indicate full length TNKS1 (upper band, 150kDa) and an undefined TNKS1 isoform (lower band). \*indicate IgG chains.

**A** BMDMs

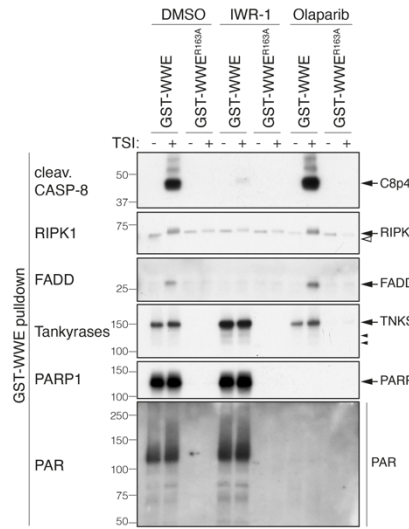

**B** MDFs

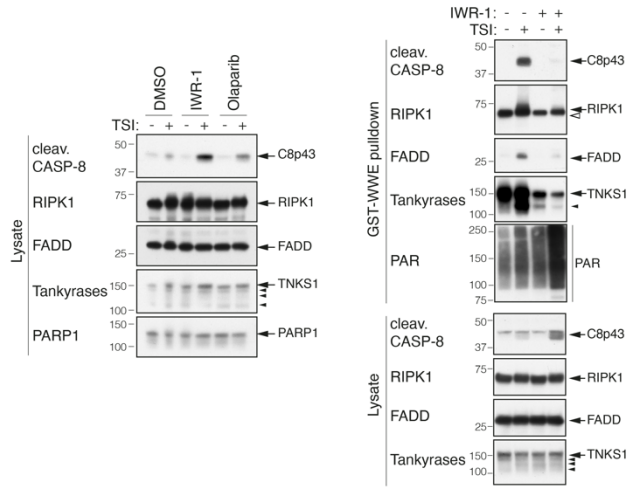

**C** *Tnks2*<sup>-/-</sup> MDFs

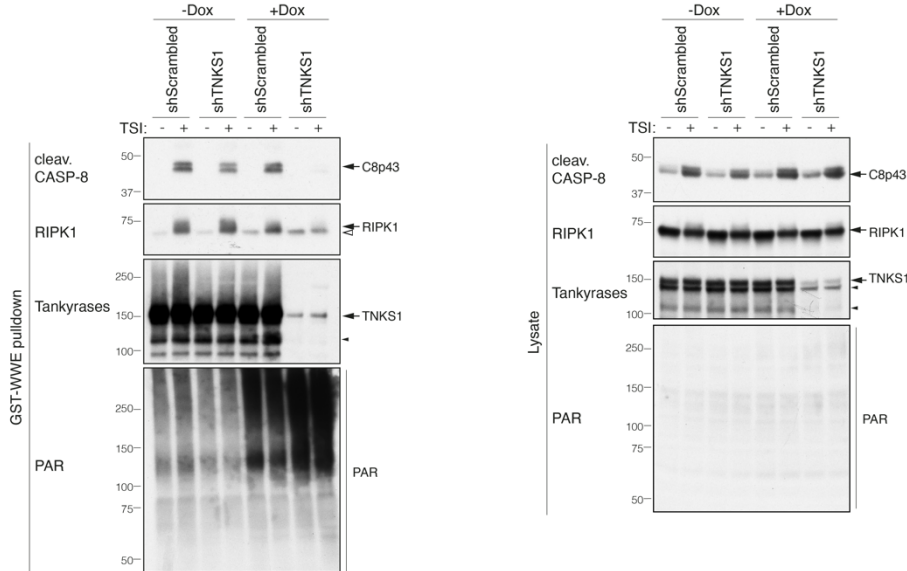

**D** MEFs

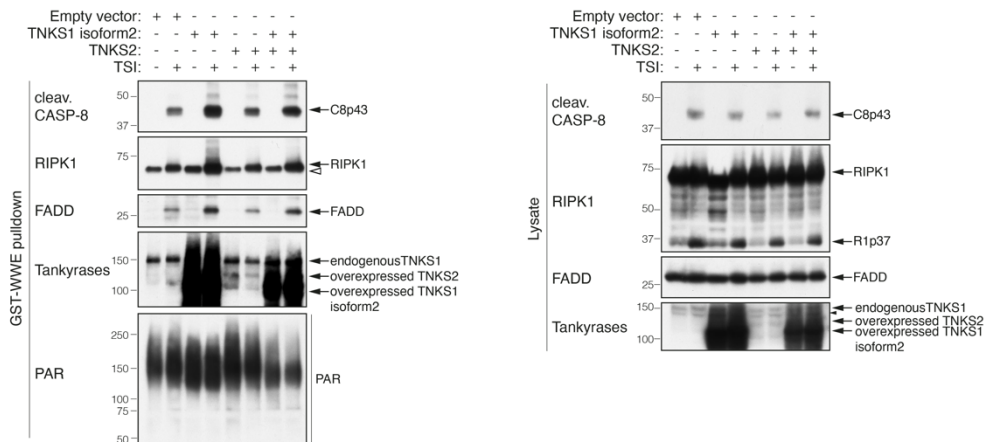

**E**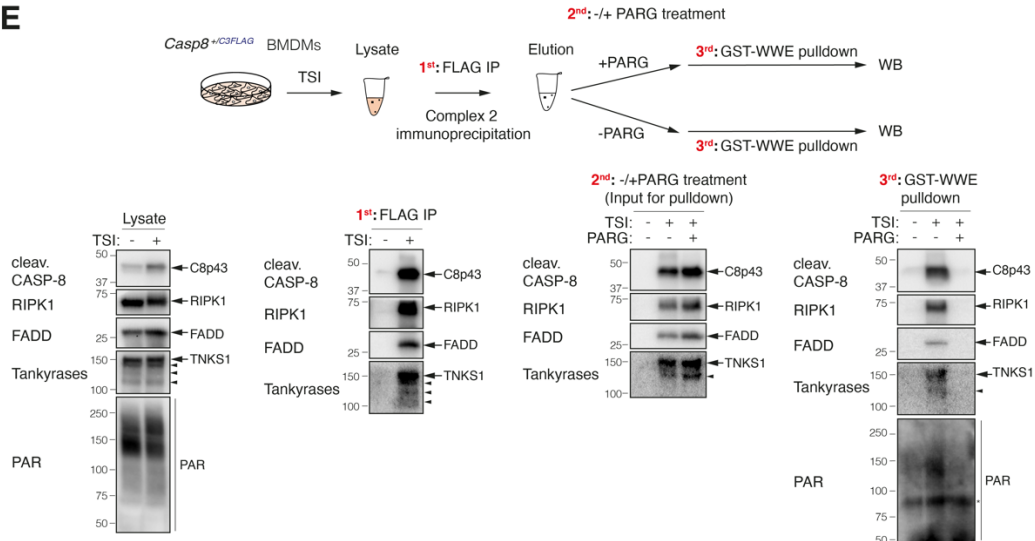**F**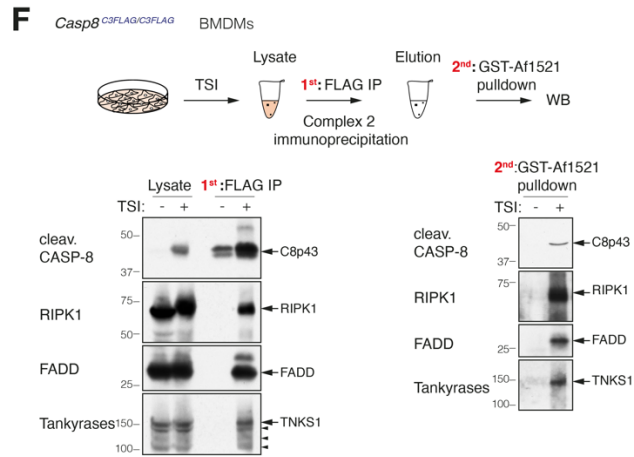**G**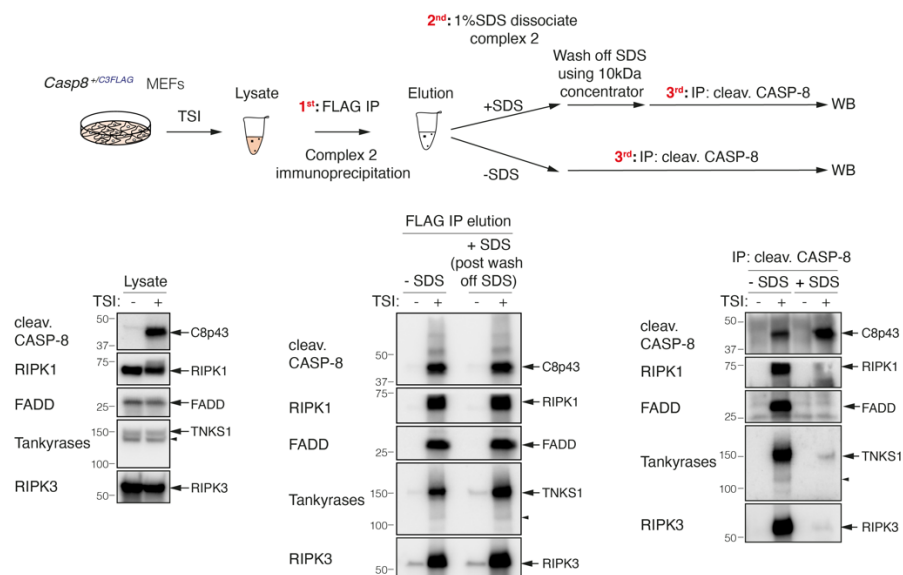

**H**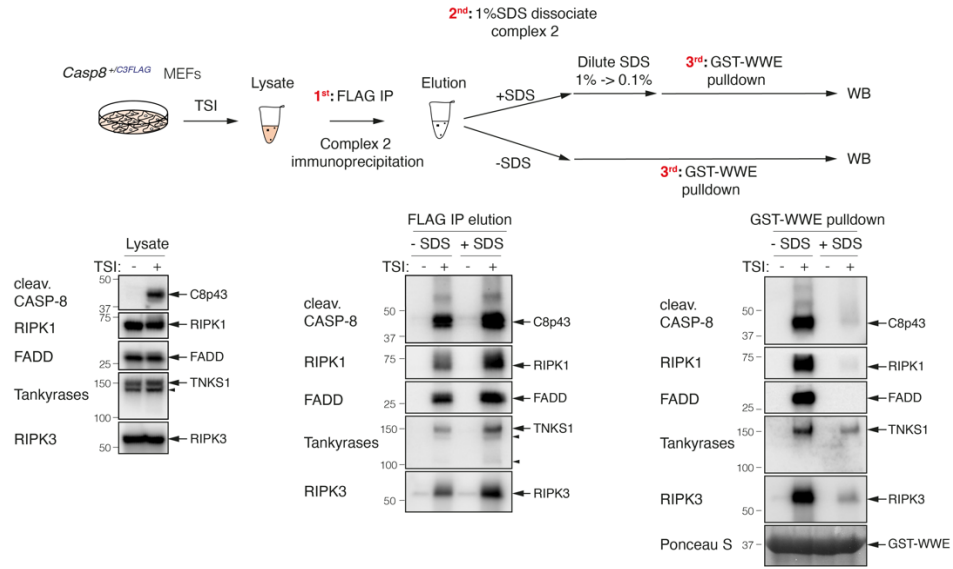**I**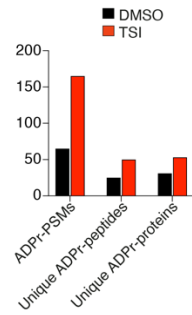**J**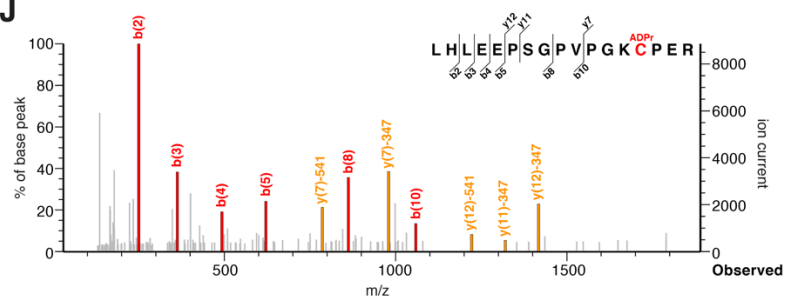**K** BMDMs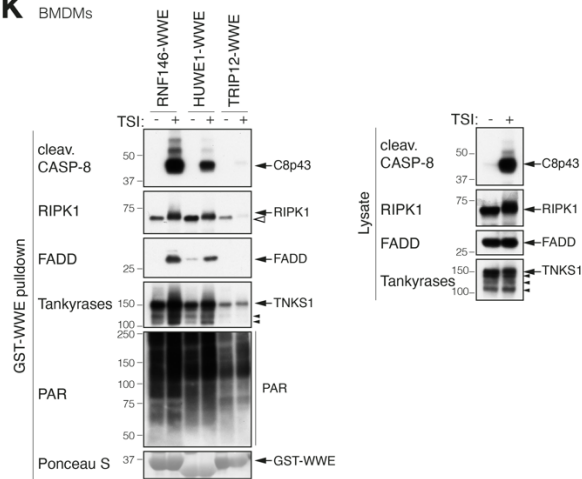



## Fig. S2. Complex 2 is PARylated

**A**, GST-WWE and GST-WWE<sup>R163A</sup> pull-down of stimulated WT BMDMs lysates. Cells were treated with TNF (10 ng/mL) + Smac-mimetic (250 nM) + caspase inhibitor (5  $\mu$ M) (TSI)  $\pm$  tankyrase inhibitor IWR-1 (5  $\mu$ M) or  $\pm$  PARP1/2 inhibitor olaparib (1  $\mu$ M) for 1.5 hours before being subjected to GST pull-down. Western blot analysis using the indicated antibodies is shown. Anti-PAR (MABC547, Sigma) was used to recognize PAR chains.

**B**, GST-WWE pull-down of stimulated WT MDFs lysates. Cells were treated with TNF (100 ng/mL) + Smac-mimetic (500 nM) + caspase inhibitor (5  $\mu$ M) (TSI) for 1.5 hours  $\pm$  tankyrase inhibitor IWR-1 (10  $\mu$ M) before being subjected to GST pull-down. Western blot analysis using the indicated antibodies is shown. Anti-PAR (MABC547, Sigma) was used to recognize PAR chains.

**C**, GST-WWE pull-down of stimulated *Tnks2*<sup>-/-</sup> MDFs lysates. *Tnks2*<sup>-/-</sup> MDFs expressing Dox-inducible Scrambled shRNA or TNKS1 shRNA were pre-treated with  $\pm$  Dox (1  $\mu$ g/mL) for 48 hours before being stimulated with TSI (as in **B**)  $\pm$  Dox (1  $\mu$ g/mL) for 1.5 hours. Cell lysates were subjected to GST-WWE pull-down. Western blot analysis using the indicated antibodies is shown. Anti-PAR (MABC547, Sigma) was used to recognize PAR chains.

**D**, GST-WWE pull-down of stimulated WT MEFs lysates. WT MEFs expressing Dox-inducible murine TNKS1 (isoform 2) or/and TNKS2 or empty vector were pre-treated with Dox (20 ng/mL) overnight before being stimulated with TSI (as in **B**) for 1.5 hours. Cell lysates were subjected to GST-WWE pull-down. Western blot analysis using the indicated antibodies is shown. Anti-PAR (MABC547, Sigma) was used to recognize PAR chains.

**E**, Enrichment of PARylated complex 2 using GST-WWE in a sequential pull-down analysis. *Casp8*<sup>+/C3FLAG</sup> BMDMs were treated with TSI (as in **B**) and complex 2 was immunoprecipitated using anti-FLAG M2 affinity beads. Immunoprecipitants were eluted with 3x FLAG peptides followed by  $\pm$  PARG treatment at 37 °C for 3 hours before being subjected to GST-WWE pull-down. FLAG IP eluate  $\pm$  PARG treatment samples (input for GST-WWE pull-down) were taken for Western blot analysis to show that PARG didn't cause degradation of complex 2 components. Western blot analysis of lysates and sequential pull-down using the indicated antibodies is shown. Anti-PAR (Poly/Mono-ADPRibose (E6F6A) Rabbit mAb #83732, Cell Signaling Technology) was used to recognize PAR chains.

**F**, Enrichment of PARylated complex 2 using GST-Af1521 in a sequential pull-down analysis. *Casp8*<sup>C3FLAG/C3FLAG</sup> BMDMs were treated with TSI (as in **B**) and complex 2 was immunoprecipitated using anti-FLAG M2 affinity beads. Immunoprecipitants were eluted using 3x FLAG peptides followed by GST-Af1521 pull-down. Western blot analysis of lysates and sequential pull-down using the indicated antibodies is shown.

**G**, Dissociation of complex 2 using 1% SDS. *Casp8*<sup>+/C3FLAG</sup> MEFs were treated with TSI (as in **B**) and complex 2 was immunoprecipitated using anti-FLAG M2 affinity beads. Immunoprecipitants were eluted using 3x FLAG peptides followed by incubation with 1% SDS (final concentration) at 25 °C for 4 hours. SDS was then washed off using a 10 kDa concentrator (Millipore) to minimize the potential disruption of immunoprecipitation in the following step and a sample was Western blotted to ensure that SDS didn't affect complex 2 components (middle panel). The SDS-treated FLAG IP eluate was then subjected to anti-cleaved caspase-8 IP and FLAG IP eluate without SDS treatment was used as control. Anti-cleaved caspase-8 IP suggested that most of complex 2 was dissociated in 1% SDS as compared with no SDS control.

**H**, GST-WWE pull-down of disassembled complex 2. Complex 2 was purified and dissociated as in **G**. A sample was Western blotted to ensure that SDS didn't affect complex 2 components (middle panel). SDS was diluted from 1% to 0.1% to minimize the potential disruption of pull-down in the following step. The SDS-treated FLAG IP eluate was then subjected to GST-WWE pull-down and FLAG IP eluate without SDS treatment was used as control. Ponceau S staining of the purified proteins and their quantities used in the pull-down assay is shown.

**I**, TSI treatment results in global ADP-ribosylome changes in BMDMs lysates. Numbers of ADP-ribosylated peptide spectral matches (ADPr-PSMs), unique ADP-ribosylated peptides and unique ADP-ribosylated proteins identified in the untreated (DMSO) and TSI-treated cells are shown, respectively.

**J**, Spectrum of RIPK3 ADP-ribosylated peptide, with ADP-ribose on C360, is identified in BMDMs lysates following TSI stimulation.

**K**, GST-HUWE1, -TRIP12 and -RNF146 WWE pull-down stimulated WT BMDMs lysates. Cells were treated with TSI (as in **B**) and lysates were subjected to GST-WWE pull-down assays. Western blot analysis using the indicated antibodies is shown. Ponceau S staining of the purified proteins and their quantities used in the pull-down assay is shown. Anti-PAR (MABC547, Sigma) was used to recognize PAR chains.

Filled arrowheads alone indicate potential tankyrase species. Double bands around 150kDa in anti-tankyrase blots indicate full length TNKS1 (upper band, 150kDa) and an undefined TNKS1 isoform (lower band). Empty arrowheads alone denote unmodified RIPK1 that is purified non-specifically by Sepharose GST-WWE.

**A**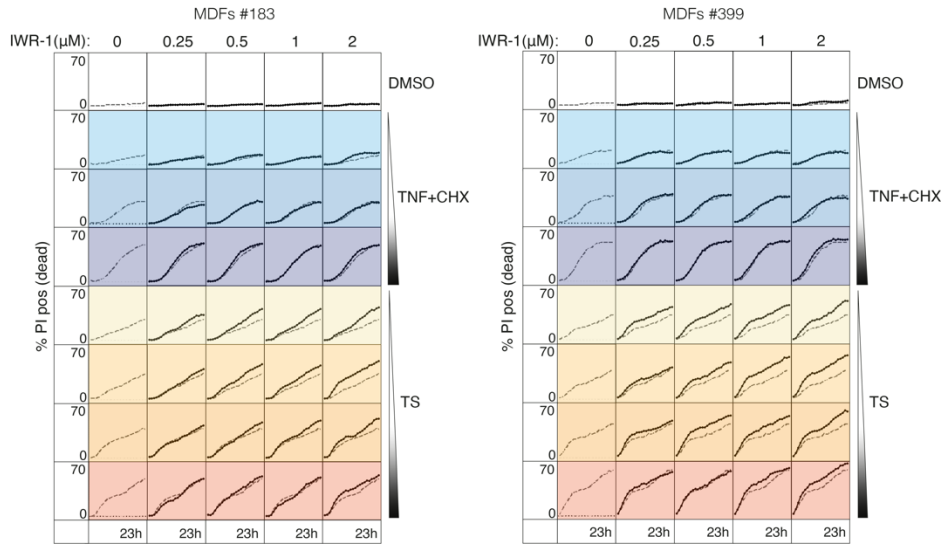**B**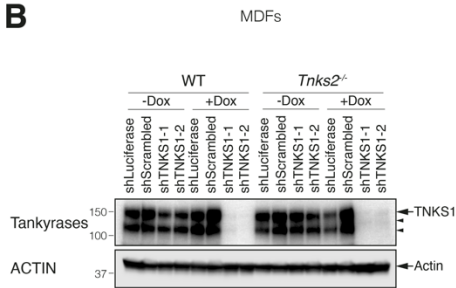**C**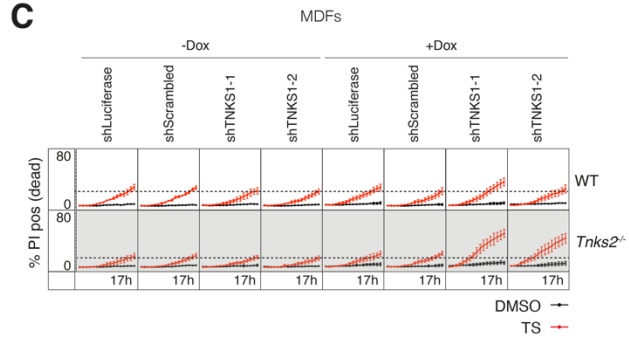**D**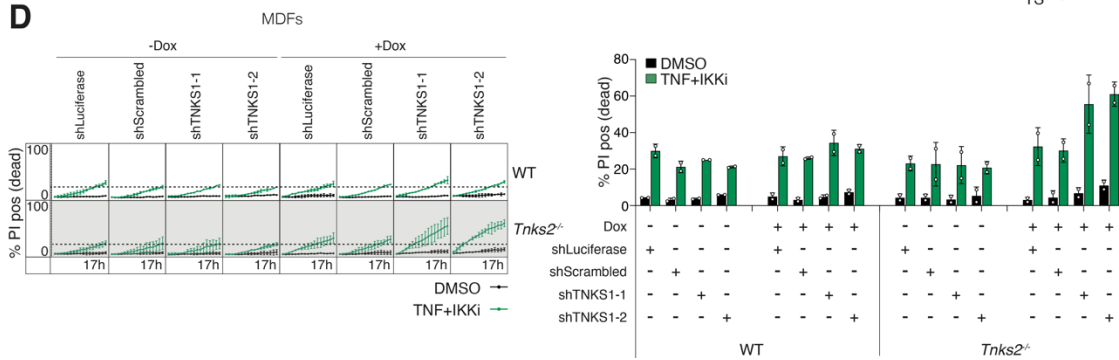**E**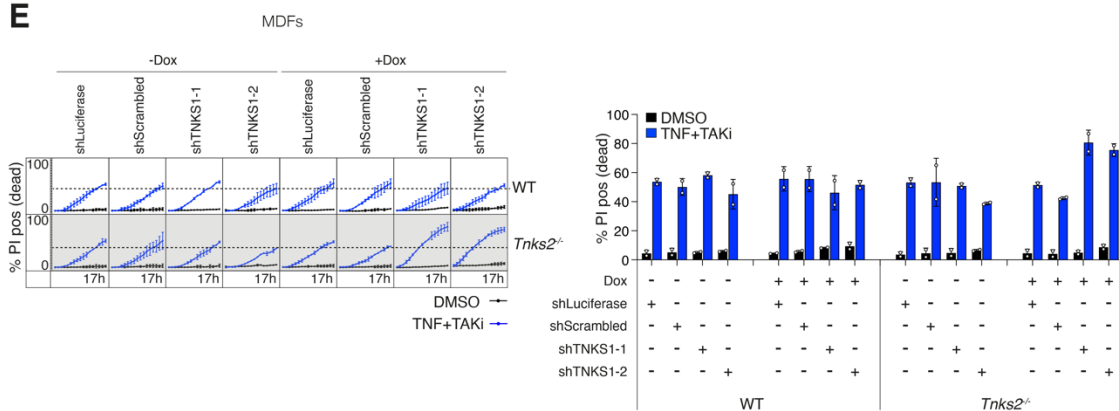

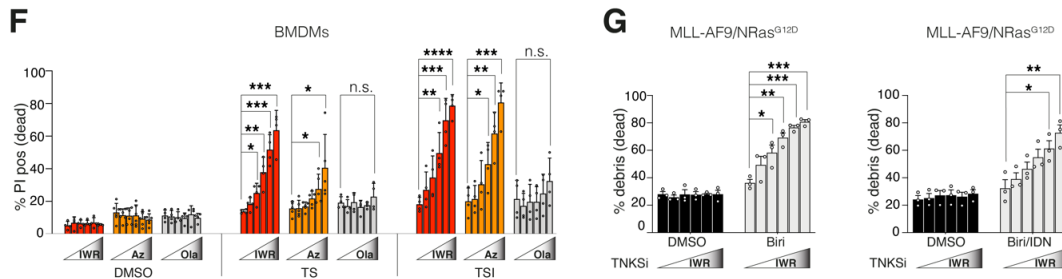

**Fig. S3. Tankyrases protect from TNF-induced cell death**

**A**, Cell death of WT MDFs, monitored by time-lapse imaging of PI staining (dead cells) over 23 hours. WT MDFs were treated with DMSO, TNF+cycloheximide (TNF+CHX) or TNF+Smac-mimetic (TS) (rows)  $\pm$  tankyrase inhibitor IWR-1 (columns) for 23 hours. TNF: 50 ng/mL. Smac-mimetic: 50 nM, 100 nM, 250 nM, 500 nM. CHX: 0.25  $\mu$ g/mL, 0.5  $\mu$ g/mL, 1  $\mu$ g/mL. IWR-1: 250 nM, 500 nM, 1  $\mu$ M, 2  $\mu$ M. Cell death was quantified by PI uptake and time-lapse imaging every 1 hour using IncuCyte. % PI positive (dead) was obtained by normalizing PI count to total cell number (SPY505-DNA cell nuclear stain). Dashed lines denote the % PI positive (dead) without IWR-1 treatment for reference. The results from two independent MDFs are shown.

**B**, Western blot analysis of TNKS1 knockdown efficiency in WT or *Tnks2*<sup>-/-</sup> MDFs expressing Dox-inducible shLuciferase, shScrambled or two independent TNKS1 shRNA. Cells were pre-treated with  $\pm$  Dox (1  $\mu$ g/mL) for 48 hours and then subjected to Western blot analysis. Filled arrowhead alone indicates potential tankyrase species.

**C**, Cell death monitored by time-lapse imaging of PI staining (dead cells) over 17 hours. WT MDFs or *Tnks2*<sup>-/-</sup> MDFs expressing Dox-inducible shLuciferase, shScrambled or two independent TNKS1 shRNAs were pre-treated with  $\pm$  Dox (1  $\mu$ g/mL) for 48 hours followed by TNF (50 ng/mL) + Smac-mimetic (10 nM) (TS)  $\pm$  Dox (1  $\mu$ g/mL) for 17 hours. Cell death was quantified by PI uptake and time-lapse imaging every 1 hour using IncuCyte. % PI positive (dead) was obtained by normalizing PI count to total cell number (SPY700-DNA cell nuclear stain). Dashed lines denote % PI positive (dead) in cells where the shRNA is not induced for reference. Graph shows mean  $\pm$  SEM, n=4 independent experiments generated from two independent MDFs.

**D-E**, Left, Cell death monitored by time-lapse imaging of PI staining (dead cells) over 17 hours. WT MDFs or *Tnks2*<sup>-/-</sup> MDFs expressing Dox-inducible shLuciferase, shScrambled or two independent TNKS1 shRNAs were pre-treated with  $\pm$  Dox (1  $\mu$ g/mL) for 48 hours followed by indicated stimulations  $\pm$  Dox (1  $\mu$ g/mL) for 17 hours. Cells were treated with TNF (50 ng/mL) combined with IKK inhibitor (IKKi; 250 nM) (**D**), TAK1 inhibitor (TAKi; 100 nM) (**E**). Cell death was quantified by PI uptake and time-lapse imaging every 1 hour using IncuCyte. % PI positive (dead) was obtained by normalizing PI count to total cell number (SPY700-DNA cell nuclear stain). Dashed lines denote % PI positive (dead) in cells where the shRNA is not induced for reference. Right, % PI positive (dead) at 17 hours indicated stimulations was plotted to generate bar graph. Graphs show mean  $\pm$  SD, n=2 independent MDFs.

**F**, Amount of cell death assessed by PI positive cells by flow cytometry. WT BMDMs were treated with TNF (10 ng/mL) + Smac-mimetic (500 nM) (TS) or TNF (10 ng/mL) + Smac-mimetic (10 nM) + caspase inhibitor (5  $\mu$ M) (TSI)  $\pm$  tankyrase inhibitor IWR-1 or  $\pm$  Az6102 or  $\pm$  PARP1/2 inhibitor olaparib for 16 hours. IWR-1: 250 nM, 500 nM, 1  $\mu$ M, 2  $\mu$ M, 5  $\mu$ M. Az6102: 125 nM, 250 nM, 500 nM, 1  $\mu$ M, 2  $\mu$ M. Olaparib: 62.5 nM, 125 nM, 250 nM, 500 nM, 1  $\mu$ M. Graph shows

mean  $\pm$  SEM, n = 4-5 independent BMDMs. Comparisons were performed with a Student's t test whose values are denoted in the figures as \*p  $\leq$  0.05, \*\*p  $\leq$  0.01, \*\*\*p  $\leq$  0.001, \*\*\*\*p  $\leq$  0.0001 and n.s.= no significance.

**G**, Amount of cell death assessed by percentage of cell debris by flow cytometry. MLL-AF9/NRas<sup>G12D</sup> leukemic cells were treated with Smac-mimetic birinapant (500 nM)  $\pm$  tankyrase inhibitor IWR-1 (250 nM, 500 nM, 1  $\mu$ M, 2  $\mu$ M, 5  $\mu$ M) for 15 hours or Smac-mimetic birinapant (20 nM) + caspase inhibitor IDN-6556 (5  $\mu$ M)  $\pm$  IWR-1 (250 nM, 500 nM, 1  $\mu$ M, 2  $\mu$ M, 5  $\mu$ M) for 7 hours. Graph shows mean  $\pm$  SEM, n=3 independent MLL-AF9/NRas<sup>G12D</sup> leukemic cells. Comparisons were performed with a Student's t test whose values are denoted in the figures as \*p  $\leq$  0.05, \*\*p  $\leq$  0.01 and \*\*\*p  $\leq$  0.001.

**A** *Casp8<sup>C3FLAG/C3FLAG</sup>* MEFs

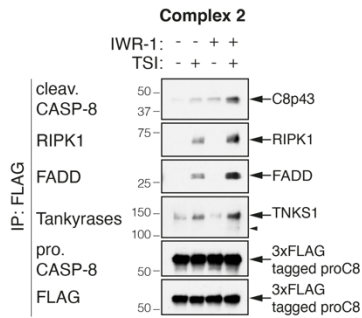

**B** *Tnks2<sup>-/-</sup>* Dox-shTNKS1 MEFs

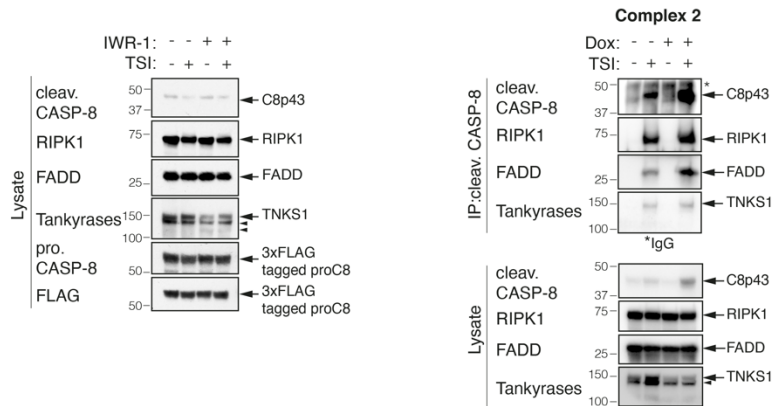

**C** *Ripk1<sup>D325A/+</sup>* MDFs #351

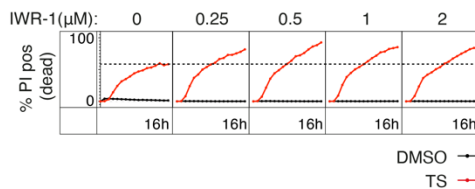

*Ripk1<sup>D325A/+</sup>* MDFs #716

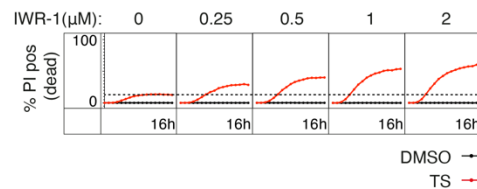

### Fig. S4. Tankyrases limit complex 2 assembly

**A**, TNF-induced complex 2 immunoprecipitation using anti-FLAG M2 affinity beads. Western blot analysis of complex 2 and lysates from *Casp8<sup>C3FLAG/C3FLAG</sup>* MEFs using the indicated antibodies is shown. Cells were treated with TNF (100 ng/mL) + Smac-mimetic (50 nM) + caspase inhibitor (5 μM) (TSI) ± tankyrase inhibitor IWR-1 (5 μM) for 2 hours before being subjected to anti-FLAG immunoprecipitation.

**B**, TNF-induced complex 2 immunoprecipitation using anti-cleaved caspase-8 antibody. Western blot analysis of complex 2 and lysates from *Tnks2<sup>-/-</sup>* MEFs expressing Dox-inducible TNKS1 shRNA using the indicated antibodies is shown. Cells were pre-treated with ± Dox (1 μg/mL) for 48 hours followed by TNF (100 ng/mL) + Smac-mimetic (250 nM) + caspase inhibitor (5 μM) (TSI) for 2 hours before being subjected to anti-cleaved caspase-8 immunoprecipitation.

**C**, Cell death monitored by time-lapse imaging of PI staining over 16 hours using IncuCyte. *Ripk1<sup>D325A/+</sup>* heterozygote MDFs were treated with TNF (50 ng/mL) + Smac-mimetic (10 nM or 100 nM) (TS) ± tankyrase inhibitor IWR-1 (250 nM, 500 nM, 1 μM, 2 μM) for 16 hours. Cell death was quantified by PI uptake and time-lapse imaging every 1 hour using IncuCyte. % PI positive (dead) was obtained by normalizing PI count to cell confluency. Dashed lines denote the % PI positive (dead) without IWR-1 treatment for reference. The results from two independent MDFs are shown.

Filled arrowheads alone indicate potential tankyrase species. Double bands around 150kDa in anti-tankyrase blots indicate full length TNKS1 (upper band, 150kDa) and an undefined TNKS1 isoform (lower band). \*indicate IgG chains.

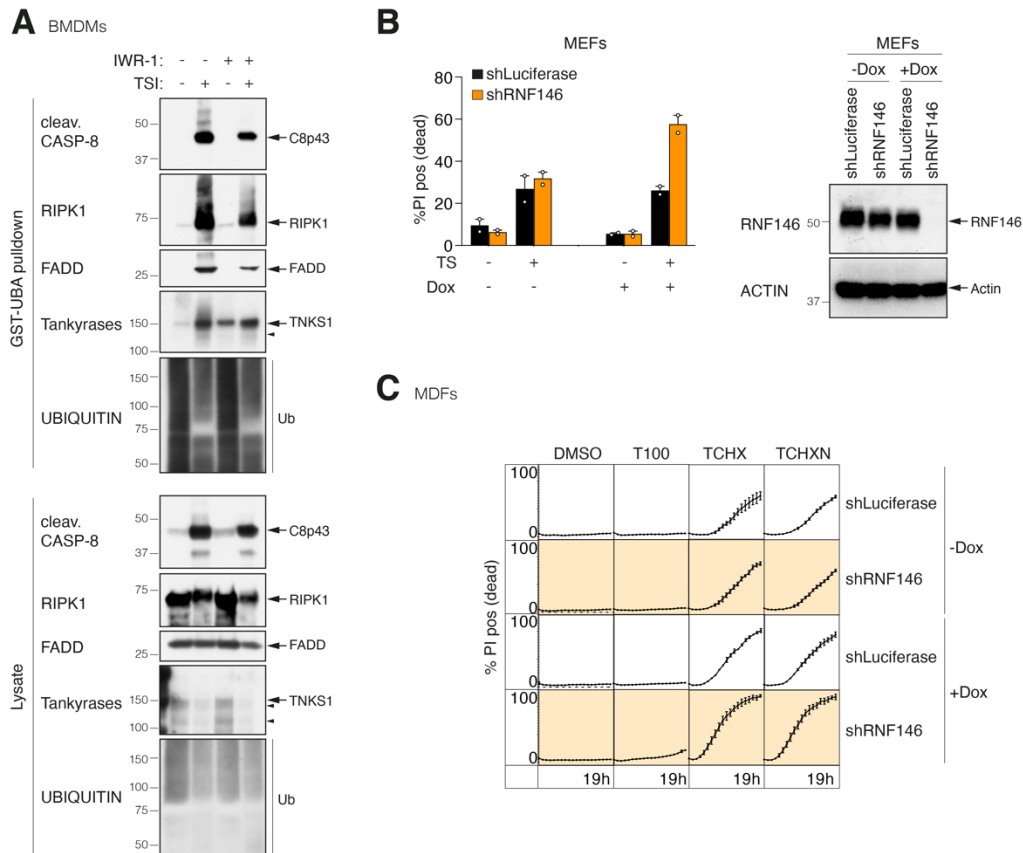

**Fig. S5. The tankyrase-RNF146 axis regulates the stability of complex 2 and TNF-induced death**

**A**, GST-UBA pull-down of stimulated WT BMDM lysates. Cells were treated with TNF (100 ng/mL) + Smac-mimetic (500 nM) + caspase inhibitor (5  $\mu$ M) (TSI) for 1.5 hours  $\pm$  IWR-1 (5  $\mu$ M) before being subjected to GST-UBA pull-down. Western blot analysis using the indicated antibodies is shown.

**B**, Level of cell death assessed by PI positive cells. WT MEFs expressing Dox-inducible shLuciferase or shRNF146 were pre-treated with  $\pm$  Dox (1  $\mu$ g/mL) for 48 hours. Cells were then subjected to Western blot analysis or treated with TNF (100 ng/mL) + Smac-mimetic (25 nM) (TS)  $\pm$  Dox (1  $\mu$ g/mL) for another 12 hours. Graph shows mean  $\pm$  SD throughout, n = 2 independent MEFs.

**C**, Cell death monitored by time-lapse imaging of PI staining over 19 hours. WT MDFs expressing GFP tagged Dox-inducible shLuciferase or shRNF146 were pre-treated with  $\pm$  Dox (1  $\mu$ g/mL) for 48 hours, followed by indicated stimulations  $\pm$  Dox (1  $\mu$ g/mL) for another 19 hours. T100 denotes 100 ng/mL TNF; T denotes 50 ng/mL TNF; CHX denotes 1  $\mu$ g/mL cycloheximide; N denotes 10  $\mu$ M Nec-1s. Cell death was quantified by PI uptake and time-lapse imaging every 1 hour using IncuCyte. % PI positive (dead) was obtained by normalizing PI count to total cell number (GFP positive cells). Graph shows mean  $\pm$  SEM, n=3 independent MDFs.

Filled arrowheads alone indicate potential tankyrase species. Double bands around 150kDa in anti-tankyrase blots indicate full length TNKS1 (upper band, 150kDa) and an undefined TNKS1 isoform (lower band).

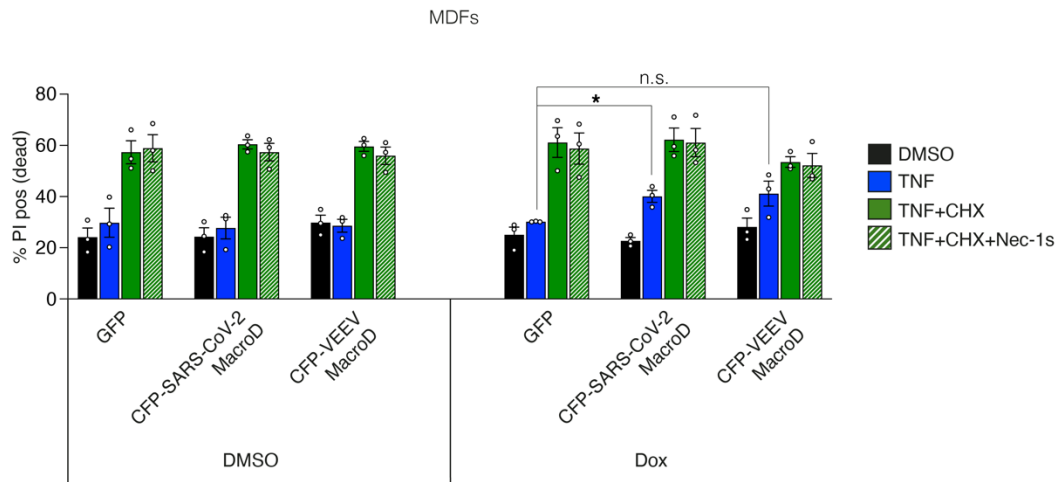

**Fig. S6. Viral macrodomains had no effect on TNF+CHX-induced death**

Level of cell death assessed by PI positive cells. WT MDFs expressing Dox-inducible GFP or CFP-SARS-CoV-2 macrodomain or CFP-VEEV macrodomain were pre-treated with  $\pm$  Dox (10 ng/mL) for 9 hours. Cells were then treated with either a high dose of TNF (100 ng/mL) or a low dose of TNF (T; 50 ng/mL) combined with cycloheximide (CHX; 1  $\mu$ g/mL)  $\pm$  Nec-1s (10  $\mu$ M) in the absence of Dox for another 20 hours, and amount of cell death was assessed by PI staining and flow cytometry. Graph shows mean  $\pm$  SEM, n=3 independent MDFs. Comparisons were performed with a Student's t test whose values are denoted as \* $p \leq 0.05$  and n.s.= no significance.



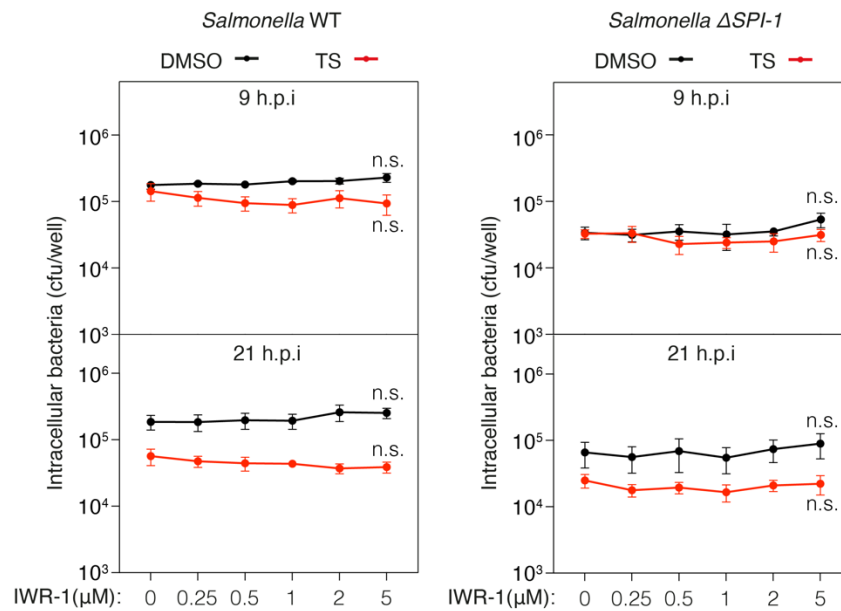

**Fig. S7. Tankyrases protect against the cytotoxic effect of TNF under infection condition**

Intracellular bacteria enumeration of *Salmonella* infected cells. iBMDMs were infected with *Salmonella* SL1344 WT or  $\Delta SPI-1$  (MOI : 2), treated with TNF (10 ng/mL) + Smac-mimetic (250 nM) (TS)  $\pm$  IWR-1 (250nM, 500nM, 1  $\mu$ M, 2  $\mu$ M, 5  $\mu$ M) at 3 hours post infection (h.p.i), then intracellular bacteria were enumerated at 9 h.p.i and 21 h.p.i. Graph shows mean  $\pm$  SEM, n=3 independent experiments. Comparisons were performed with a Student's t test whose values are denoted as n.s.= no significance.

MOI; multiplicity of infection. cfu; colony forming units.

**Table S1. MS raw data for C-terminally 3x FLAG tagged caspase-8 IP**

| Gene name | Unique peptides | Unique sequence coverage | Log2 FC TSI-untreated | P value (-Log10) | Visual verification of peptide distribution |
|-----------|-----------------|--------------------------|-----------------------|------------------|---------------------------------------------|
| Ripk1     | 26              | 54.9                     | 3.144                 | 0.000165         | Y                                           |
| Tnks      | 11              | 12.6                     | 1.717                 | 0.003173         | Y                                           |
| Fpgs      | 6               | 18.3                     | 1.576                 | 0.012165         | N                                           |
| Ripk3     | 14              | 42.4                     | 1.442                 | 0.030146         | Y                                           |
| Vps52     | 6               | 9.1                      | 1.342                 | 0.060197         | N                                           |
| Tnfaip3   | 7               | 10.3                     | 1.236                 | 0.018105         | Y                                           |
| Tab1      | 9               | 31.3                     | 0.785                 | 0.183953         | N                                           |
| Immt      | 1               | 47.2                     | 0.781                 | 0.140838         | N                                           |
| Tradd     | 6               | 26.8                     | 0.554                 | 0.399367         | Y                                           |
| Dnajc13   | 35              | 20.6                     | 0.547                 | 0.247936         | N                                           |
| Mbn1      | 6               | 23.6                     | 0.504                 | 0.371307         | N                                           |
| Tu52      | 5               | 10.8                     | 0.458                 | 0.440472         | N                                           |
| Fadd      | 7               | 50.2                     | 0.445                 | 0.535684         | Y                                           |
| Huwe1     | 40              | 14.4                     | 0.365                 | 0.514900         | N                                           |
| Ncbp1     | 10              | 15.1                     | 0.354                 | 0.556543         | N                                           |
| Carkd     | 1               | 27.9                     | 0.295                 | 0.527826         | N                                           |
| Ilk       | 16              | 40.7                     | 0.263                 | 0.431446         | N                                           |
| Dars      | 32              | 67.5                     | 0.169                 | 0.521317         | N                                           |
| Casp8     | 45              | 82.9                     | 0.144                 | 0.888903         | N/A                                         |
| Akap12    | 30              | 30.6                     | 0.121                 | 0.848520         | N                                           |
| Nab1      | 3               | 11.9                     | 0.059                 | 0.899417         | N                                           |
| Fam129a   | 16              | 21.3                     | 0.022                 | 0.969615         | N                                           |
| Fam45a    | 7               | 22.4                     | 0.002                 | 0.997329         | N                                           |
| Rraga     | 1               | 22.4                     | -0.023                | 0.960796         | N                                           |
| Apaf1     | 8               | 7.9                      | -0.028                | 0.955331         | N                                           |
| Slc1a5    | 4               | 11.5                     | -0.068                | 0.904336         | N                                           |
| Urod      | 7               | 30.8                     | -0.069                | 0.889015         | N                                           |
| Fbxo38    | 11              | 12.8                     | -0.121                | 0.774825         | N                                           |
| Kti12     | 6               | 30.5                     | -0.158                | 0.740669         | N                                           |
| Copg2     | 11              | 20.9                     | -0.173                | 0.688017         | N                                           |
| Prmt3     | 6               | 13.6                     | -0.208                | 0.717812         | N                                           |

*(Continued on next page)*

*Continued*

| Gene name | Unique peptides | Unique sequence coverage | Log2 FC TSI-untreated | P value (-Log10) | Visual verification of peptide distribution |
|-----------|-----------------|--------------------------|-----------------------|------------------|---------------------------------------------|
| Rragc     | 5               | 13.1                     | -0.375                | 0.451706         | N                                           |
| Tmem173   | 8               | 31.5                     | -0.385                | 0.507883         | N                                           |
| Cth       | 3               | 10.3                     | -0.745                | 0.124432         | N                                           |
| Rint1     | 5               | 9.9                      | -0.774                | 0.068940         | N                                           |
| Hsd11     | 5               | 21.5                     | -0.851                | 0.220485         | N                                           |
| Hacd3     | 4               | 14.6                     | -1.131                | 0.053466         | Y                                           |
| Cwc22     | 5               | 7.7                      | -1.355                | 0.041065         | N                                           |

*Casp8*<sup>-/-</sup>.*Mkl*<sup>-/-</sup> MDFs expressing Dox-inducible C-terminally 3x FLAG tagged caspase-8 (caspase-8 C3FLAG) were treated with 20 ng/mL Dox for 3 hours followed by TNF (100 ng/mL) + Smac-mimetic (500 nM) + IDN-6556 (5 μM) (TSI) for 1.5 hours in the absence of Dox before being subjected to anti-FLAG immunoprecipitation. Untreated *Casp8*<sup>-/-</sup>.*Mkl*<sup>-/-</sup> MDFs expressing Dox-inducible tagless caspase-8 were used as negative control. Immunoprecipitants were eluted by FLAG peptide and then subjected to Mass Spectrometry analysis. Proteins shown in this table were filtered by requiring a P value <0.05 in a pairwise comparison between the caspase-8 C3FLAG in either the untreated or TSI-treated samples and the untreated tagless caspase-8 negative control.

Y: a clear visual difference in the peptide distribution between untreated and TSI treated samples  
N: not a strong visual difference in the peptide distribution between untreated and TSI treated samples

N/A: not applicable

### **Table S2. ADP-ribosylome ± TSI stimulation in BMDMs lysates**

BMDMs were treated with TNF (100 ng/mL) + Smac-mimetic (500 nM) + caspase inhibitor (5 μM) (TSI) for 1.5 hours. Lysates were prepared in 6M GdnHCl. Identification of ADP-ribosylated peptides was performed and all relevant data have been deposited to the ProteomeXchange Consortium via the PRIDE (<http://www.ebi.ac.uk/pride>) partner repository with the data set identifier PXD032131.
